# Supplementary material for: Dietary Patterns in Runners with Gastrointestinal Disorders
Source: MDPI journal article supplement (doi:10.3390/nu13020448), 2021-01-29
Supplement: s1 [file s1]

**Table S1: Customized Food Categories**

Table S1 Customized Food Categories provides example foods for the coding of the open-ended question “When RACING please describe what you would typically choose to eat and/or drink (including any supplements or special products) within the 4 hours before running RACES/COMPETITIONS”.

| Food Category            | Example Foods                                                                                                                                                                                                                                                                                                                                                                                                                                |
|--------------------------|----------------------------------------------------------------------------------------------------------------------------------------------------------------------------------------------------------------------------------------------------------------------------------------------------------------------------------------------------------------------------------------------------------------------------------------------|
| Gluten free grains       | <ul style="list-style-type: none"> <li>• Rice (brown, white, wild)</li> <li>• Rice Cakes</li> <li>• Gluten-free Bread</li> <li>• Gluten-free Pasta</li> <li>• Gluten-free Crackers</li> <li>• Gluten-free Pancakes/Gluten-free Waffles</li> <li>• Gluten-free Corn Tortillas</li> <li>• Amaranth</li> <li>• Arrowroot</li> <li>• Buckwheat</li> <li>• Millet</li> <li>• Quinoa</li> <li>• Sago</li> <li>• Sorghum</li> <li>• Teff</li> </ul> |
| Grains containing gluten | <ul style="list-style-type: none"> <li>• Bread/Toast/Bun/Roll</li> <li>• Pasta (white or whole wheat or whole grain)</li> <li>• Muffin</li> <li>• Bagel</li> <li>• Tortilla/Wrap</li> <li>• Pitas</li> <li>• English Muffin</li> <li>• Croissant</li> <li>• Granola Bar</li> <li>• Pancakes/Waffles/Crepes</li> <li>• Spelt</li> <li>• Bulgur</li> <li>• Wheat Berries</li> <li>• Barley</li> <li>• Couscous</li> </ul>                      |
| Snack food salty         | <ul style="list-style-type: none"> <li>• Potato chips</li> <li>• Tortillas</li> <li>• Popcorn</li> <li>• Pretzels</li> <li>• Crackers</li> </ul>                                                                                                                                                                                                                                                                                             |
| Breakfast cereal cold    | <ul style="list-style-type: none"> <li>• Wheat cereals</li> <li>• Bran cereals</li> <li>• Oat cereals (unless specifies gluten free)</li> <li>• Granola (unless specified gluten free)</li> </ul>                                                                                                                                                                                                                                            |

|                                   |                                                                                                                                                                                                                                                                                                                                                                                                                                                                 |
|-----------------------------------|-----------------------------------------------------------------------------------------------------------------------------------------------------------------------------------------------------------------------------------------------------------------------------------------------------------------------------------------------------------------------------------------------------------------------------------------------------------------|
|                                   | <ul style="list-style-type: none"> <li>• Muesli (unless specifies gluten free)</li> </ul>                                                                                                                                                                                                                                                                                                                                                                       |
| Breakfast cereal cold gluten free | <ul style="list-style-type: none"> <li>• Rice cereals</li> <li>• Any other cereals specifically noted as gluten free</li> </ul>                                                                                                                                                                                                                                                                                                                                 |
| Breakfast cereal regular hot      | <ul style="list-style-type: none"> <li>• Any hot cereal containing gluten</li> <li>• Oatmeal (unless specifies gluten free)</li> <li>• Wheat cereal</li> <li>• Whole grain cereal</li> </ul>                                                                                                                                                                                                                                                                    |
| Breakfast cereal hot, gluten free | <ul style="list-style-type: none"> <li>• Gluten free oats</li> <li>• Gluten free oatmeal</li> <li>• Rice cereal</li> <li>• Porridge specified gluten free</li> </ul>                                                                                                                                                                                                                                                                                            |
| Low FODMAP fruit                  | <ul style="list-style-type: none"> <li>• Avocado</li> <li>• Blueberry</li> <li>• Raspberry</li> <li>• Grapes</li> <li>• Honeydew Melon</li> <li>• Kiwi</li> <li>• Lemon</li> <li>• Lime</li> <li>• Orange</li> <li>• Pineapple</li> <li>• Papaya</li> <li>• Pomegranate</li> <li>• Raisins, dried cranberries, currants</li> <li>• Strawberries</li> </ul>                                                                                                      |
| High FODMAP fruit                 | <ul style="list-style-type: none"> <li>• Apple</li> <li>• Apricot</li> <li>• Banana (ripe)</li> <li>• Blackberry</li> <li>• Cherries</li> <li>• Dates</li> <li>• Figs</li> <li>• Gogi berries, dried</li> <li>• Grapefruit</li> <li>• Lychee</li> <li>• Mango</li> <li>• Nectarine</li> <li>• Peach</li> <li>• Pear</li> <li>• Persimmon</li> <li>• Pineapple, dried</li> <li>• Plums</li> <li>• Prunes</li> <li>• Watermelon</li> <li>• Dried Fruit</li> </ul> |

|                                                                   |                                                                                                                                                                                                                                                                                                                                                                                                                                                                                                                                                                                                                                                                       |
|-------------------------------------------------------------------|-----------------------------------------------------------------------------------------------------------------------------------------------------------------------------------------------------------------------------------------------------------------------------------------------------------------------------------------------------------------------------------------------------------------------------------------------------------------------------------------------------------------------------------------------------------------------------------------------------------------------------------------------------------------------|
|                                                                   | <ul style="list-style-type: none"> <li>• Fruit bars</li> </ul>                                                                                                                                                                                                                                                                                                                                                                                                                                                                                                                                                                                                        |
| Low FODMAP Starchy Veg<br>(contain > 22 g carbs in ½ cup serving) | <ul style="list-style-type: none"> <li>• French Fries</li> <li>• Potato (mashed, boiled, baked, nuggets, wedges)</li> <li>• Corn (limited to ½ cob)</li> <li>• Sweet Potato (limited to ½ cup)</li> <li>• Hashbrowns</li> </ul>                                                                                                                                                                                                                                                                                                                                                                                                                                       |
| Low FODMAP Vegetables (non-starchy)                               | <ul style="list-style-type: none"> <li>• Alfalfa</li> <li>• Bamboo Shoots</li> <li>• Bean Sprouts</li> <li>• Beets</li> <li>• Bok Choy</li> <li>• Broccoli</li> <li>• Brussels sprouts</li> <li>• Cabbage</li> <li>• Lettuce, green and red</li> <li>• Carrot</li> <li>• Celery</li> <li>• Chicory leaves</li> <li>• Chili and Bell Peppers</li> <li>• Chives</li> <li>• Choy Sum</li> <li>• Collard Greens</li> <li>• Cucumber</li> <li>• Eggplant</li> <li>• Endive</li> <li>• Fennel</li> <li>• Ginger</li> <li>• Green Beans</li> <li>• Kale</li> <li>• Lettuce</li> <li>• Spinach or Spinach Salad</li> <li>• Green or Yellow Beans</li> <li>• Tomato</li> </ul> |
| High FODMAP Vegetables (non-starchy)                              | <ul style="list-style-type: none"> <li>• Asparagus</li> <li>• Cauliflower</li> <li>• Garlic</li> <li>• Green Peas</li> <li>• Leeks</li> <li>• Mushrooms</li> <li>• Onions</li> <li>• Shallots</li> <li>• Sugar Snap Peas</li> </ul>                                                                                                                                                                                                                                                                                                                                                                                                                                   |
| Legumes                                                           | <ul style="list-style-type: none"> <li>• Lentils</li> <li>• Chickpeas</li> <li>• Hummus</li> <li>• Black Beans</li> </ul>                                                                                                                                                                                                                                                                                                                                                                                                                                                                                                                                             |

|                       |                                                                                                                                                                                                                                                                                        |
|-----------------------|----------------------------------------------------------------------------------------------------------------------------------------------------------------------------------------------------------------------------------------------------------------------------------------|
|                       | <ul style="list-style-type: none"> <li>• Pinto Beans</li> <li>• Kidney Beans</li> </ul>                                                                                                                                                                                                |
| Red Meat              | <ul style="list-style-type: none"> <li>• Meat</li> <li>• Beef</li> <li>• Pork (Ham)</li> <li>• Bison</li> <li>• Game</li> <li>• Lamb</li> <li>• Other Meats</li> </ul>                                                                                                                 |
| Poultry               | <ul style="list-style-type: none"> <li>• Chicken</li> <li>• Turkey</li> <li>• Duck</li> </ul>                                                                                                                                                                                          |
| Eggs                  | <ul style="list-style-type: none"> <li>• Eggs</li> <li>• Egg Whites</li> <li>• Omelet</li> </ul>                                                                                                                                                                                       |
| Soy/Meat Alternatives | <ul style="list-style-type: none"> <li>• Tofu</li> <li>• "Veggie" burger</li> <li>• "Veggie" dogs</li> <li>• "Veggie" ground beef</li> <li>• Tempeh</li> </ul>                                                                                                                         |
| Cured Meats           | <ul style="list-style-type: none"> <li>• Beef Jerky</li> <li>• Deli Meat</li> <li>• Sausages</li> <li>• Turkey Jerky</li> <li>• Bacon</li> </ul>                                                                                                                                       |
| Fish/Seafood          | <ul style="list-style-type: none"> <li>• Salmon</li> <li>• Tuna</li> <li>• Cod</li> <li>• Haddock</li> <li>• Trout</li> <li>• Arctic Char</li> <li>• Other fish</li> </ul>                                                                                                             |
| Nut/Nut butter        | <ul style="list-style-type: none"> <li>• Peanuts</li> <li>• Peanut Butter (regular/light/natural/crunchy/smooth)</li> <li>• Almonds</li> <li>• Almond butter</li> <li>• Walnuts</li> <li>• Pecans</li> <li>• Cashews</li> <li>• Pistachios</li> <li>• Other Nuts/Nut Butter</li> </ul> |
| Seeds                 | <ul style="list-style-type: none"> <li>• Chia</li> <li>• Flax / Flax seeds</li> <li>• Hemp</li> <li>• Other Seeds/Seed Butter</li> </ul>                                                                                                                                               |

|                                              |                                                                                                                                                                                                                                                             |
|----------------------------------------------|-------------------------------------------------------------------------------------------------------------------------------------------------------------------------------------------------------------------------------------------------------------|
| Milk                                         | <ul style="list-style-type: none"> <li>• “Milk”</li> <li>• Skim milk</li> <li>• 1%, 2%, 3.5% (whole or homo)</li> <li>• Chocolate</li> </ul>                                                                                                                |
| Milk alternatives                            | <ul style="list-style-type: none"> <li>• Soy Milk/Beverage</li> <li>• Almond Milk/Beverage</li> <li>• Coconut Milk/Beverage</li> <li>• Rice Milk/Beverage</li> <li>• Cashew Milk/Beverage</li> </ul>                                                        |
| Yogurt                                       | <ul style="list-style-type: none"> <li>• Regular</li> <li>• Greek</li> <li>• Plain</li> <li>• Flavoured</li> </ul>                                                                                                                                          |
| Lactose-free Dairy Products                  | <ul style="list-style-type: none"> <li>• Lactose-free Milk</li> <li>• Lactose-free Regular Yogurt</li> <li>• Lactose-free Greek Yogurt</li> <li>• Lactose-free Chocolate Milk</li> <li>• Lactose-free Cheese</li> </ul>                                     |
| Cheese                                       | <ul style="list-style-type: none"> <li>• Cheddar Cheese</li> <li>• Mozzarella Cheese</li> <li>• Cottage Cheese</li> <li>• Babybel®</li> <li>• Cheese Strings</li> <li>• Cream Cheese</li> <li>• Feta</li> <li>• Other Cheese</li> <li>• Parmesan</li> </ul> |
| Juice                                        | <ul style="list-style-type: none"> <li>• Fruit juice (e.g. apple juice, orange juice, mango juice, etc.)</li> <li>• Vegetable juice</li> <li>• Tomato Juice</li> <li>• V8®</li> </ul>                                                                       |
| Coffee/Tea                                   | <ul style="list-style-type: none"> <li>• Coffee</li> <li>• Decaf Coffee</li> <li>• Black tea</li> <li>• Green tea</li> <li>• Herbal tea</li> <li>• Decaf Tea</li> </ul>                                                                                     |
| Energy Drink                                 | <ul style="list-style-type: none"> <li>• Red Bull®</li> <li>• Monster Energy®</li> </ul>                                                                                                                                                                    |
| Sports drink (contains carbs & electrolytes) | <ul style="list-style-type: none"> <li>• ‘Sport Drink’ (when brand not given)</li> <li>• Gatorade®</li> <li>• Powerade®</li> <li>• eLoad®</li> </ul>                                                                                                        |
| Electrolytes                                 | <ul style="list-style-type: none"> <li>• Nuun®</li> <li>• ‘Salt’ tablets (brand not given)</li> </ul>                                                                                                                                                       |

|                         |                                                                                                                                                                                                                                                                 |
|-------------------------|-----------------------------------------------------------------------------------------------------------------------------------------------------------------------------------------------------------------------------------------------------------------|
|                         | <ul style="list-style-type: none"> <li>• Powerade Zero®</li> <li>• eLoad zone tablets®</li> <li>• Ultima®</li> <li>• G2 – Gatorade®</li> </ul>                                                                                                                  |
| Sports/Carbohydrate Bar | <ul style="list-style-type: none"> <li>• ‘Sport Bar’ when brand not given</li> <li>• Clif Bar®</li> <li>• Honey Stingers Waffle®</li> <li>• PowerBar®</li> <li>• Luna®</li> <li>• Lara bar®</li> <li>• Fruit Source Bar</li> </ul>                              |
| Protein Bar             | <ul style="list-style-type: none"> <li>• ‘Protein bar’ no brand given</li> <li>• Clif Builder Bar®</li> <li>• Pure Protein®</li> </ul>                                                                                                                          |
| Sports Gel/Gummies      | <ul style="list-style-type: none"> <li>• ‘Sport gel’ (when brand not given)</li> <li>• Clif blocks®</li> <li>• Clif chews®</li> <li>• Clif shots®</li> <li>• GU®</li> <li>• “Jelly Beans”</li> </ul>                                                            |
| Other Beverages         | <ul style="list-style-type: none"> <li>• Pop / Soda</li> <li>• Iced Tea</li> <li>• Lemonade</li> <li>• Alcohol</li> <li>• Mineral Water</li> <li>• Vitaminized Water</li> </ul>                                                                                 |
| Sweeteners              | <ul style="list-style-type: none"> <li>• Maple Syrup</li> <li>• Honey</li> <li>• Jam/Jelly</li> <li>• Agave (syrup)</li> <li>• Sugar (white, brown, cane etc.)</li> </ul>                                                                                       |
| Fats/oils               | <ul style="list-style-type: none"> <li>• Butter</li> <li>• Margarine</li> <li>• Any Vegetable Oil (canola, olive, sunflower etc.)</li> <li>• Mayonnaise</li> <li>• Salad Dressing</li> <li>• Sour Cream</li> <li>• Whip cream</li> <li>• Coconut oil</li> </ul> |
| Sandwiches              | <ul style="list-style-type: none"> <li>• Submarine/Sub Sandwich</li> <li>• Sandwich</li> <li>• Wrap Sandwich</li> </ul>                                                                                                                                         |
| Pasta Dish/Pizza        | <ul style="list-style-type: none"> <li>• Pasta with Tomato Sauce</li> <li>• Pasta with Meat Sauce</li> <li>• Lasagna</li> </ul>                                                                                                                                 |

|                                      |                                                                                                                                                                                                                                                              |
|--------------------------------------|--------------------------------------------------------------------------------------------------------------------------------------------------------------------------------------------------------------------------------------------------------------|
|                                      | <ul style="list-style-type: none"> <li>• Vegetarian Lasagna</li> <li>• Macaroni and Cheese</li> <li>• Pizza</li> </ul>                                                                                                                                       |
| Burritos/Tacos                       | <ul style="list-style-type: none"> <li>• Burritos</li> <li>• Tacos</li> <li>• Fajitas</li> </ul>                                                                                                                                                             |
| Soups, Stews, Chilis and Stir Fry    | <ul style="list-style-type: none"> <li>• Soup</li> <li>• Chili</li> <li>• Vegetarian Chili</li> <li>• Mixed Stir Fry</li> </ul>                                                                                                                              |
| Other Combination Foods/Mixed Dishes | <ul style="list-style-type: none"> <li>• Any other combination food that isn't on the lists</li> </ul>                                                                                                                                                       |
| Dessert/Sweets                       | <ul style="list-style-type: none"> <li>• Cakes</li> <li>• Pies</li> <li>• Brownies</li> <li>• Cookies</li> <li>• Pudding</li> <li>• Ice Cream</li> <li>• Pastries</li> <li>• Donuts</li> <li>• Candy</li> <li>• Nutella</li> <li>• Other Desserts</li> </ul> |
